# Supplementary material for: Work Ability and Job Survival: Four-Year Follow-Up
Source: PubMed Central journal article supplement (PMC6747402; doi:10.3390/ijerph16173143), 2019-08-28
Supplement: ijerph-16-03143-s001.pdf [file ijerph-16-03143-s001.pdf]

## SUPPLEMENTARY INFORMATION 01

### “Work ability and job survival: four-year follow-up”

Maria Carmen Martinez, Frida Marina Fischer

#### Work ability index

The Work Ability Index (WAI) is an instrument that allows assessing work ability based on the workers’ self-perception. Work ability is defined as the workers’ capacity to perform work tasks as a function of the job demands and the workers’ state of health and physical and mental ability [Tuomi et al., 2006].

WAI comprises 10 questions corresponding to seven dimensions:

| Dimension                                               | Questions                                                                                                                                                         | Points |
|---------------------------------------------------------|-------------------------------------------------------------------------------------------------------------------------------------------------------------------|--------|
| 1. Current work ability compared with the lifetime best | 1. Assume that your work ability at its best has a value of 10 points. How many points would you give your current work ability?                                  | 0 – 10 |
| 2. Work ability in relation to the demands of the job   | 2. How do you rate your current work ability with respect to the physical demands of your work?                                                                   | 1 – 5  |
|                                                         | 3. How do you rate your current work ability with respect to the mental demands of your work?                                                                     | 1 – 5  |
| 3. Number of current diseases diagnosed by a physician  | 4. In the following list, mark your current diseases or injuries. Also indicate whether a physician has diagnosed or treated these diseases (list of 51 diseases) | 1 – 7  |
| 4. Estimated work impairment due to diseases            | 5. Is your illness or injury a hindrance to your current job?                                                                                                     | 1 – 6  |
| 5. Sick leave during the past year (12 months)          | 6. During the last 12 months: how many whole days have you been off work because of:                                                                              | 1 - 5  |
| 6. Own prognosis of work ability two years from now     | 7. Do you believe, according to your present state of health, that you will be able to do your current job two years from now?                                    | 1 - 7  |
| 7. Mental resources                                     | 8. Considering the last three months: Have you been able to enjoy your regular daily activities?                                                                  | 0 - 4  |
|                                                         | 9. Considering the last three months: Have you been active and alert?                                                                                             | 0 - 4  |
|                                                         | 10. Considering the last three months: Have you felt yourself to be full of hope about the future?                                                                | 0 - 4  |

The results of the seven dimensions provide a measure of work ability that ranges from 7 to 49. The higher the value, the better the work ability [Tuomi et al., 2006]. WAI was validated for use in Brazil [Martinez et al., 2009].

The initial and final scores on WAI was classified as excellent, good, moderate or poor work ability according to the criteria formulated by Kujala et al. [2005] and Tuomi et al. [2005]:

- Age  $\geq$  35 years old - poor: 7.0 to 27.9; moderate: 28.0 to 36.9; good: 37.0 to 43.9; excellent: 44.0 to 49.0 [Tuomi et al., 2005];
- Age  $<$  35 years old - poor: 7.0 to 36.9; moderate: 37.0 to 40.9; good: 41.0 to 44.9; excellent: 45.0 to 49.0 [Kujala et al., 2005];

#### **References:**

- Kujala V, Remes J, Ek E, Tammelin T, Laitinen J. 2005. Classification of Work Ability Index among young employees. *Occup Med* 55(5):399–401.
- Martinez MC, Latorre MRDO, Fischer FM. 2009. Validity and reliability of the Brazilian version of the Work Ability Index questionnaire. *Rev Saúde Pública* 43(3):55-61
- Tuomi K, Ilmarinen J, Jahkola A, Katajarinne L, Tulkki A. 2005. Índice de capacidade para o trabalho, São Carlos: EduFSCar.
- Tuomi K, Ilmarinen J, Jahkola A, Katajarinne L, Tulkki A. 2006 *Work Ability Index*, Helsinki: Finnish Institute of Occupational Health.

SUPPLEMENTARY INFORMATION 02

## Work ability and job survival: four-year follow-up

Maria Carmen Martinez, Frida Marina Fischer

### Work ability index results from the studied population

Study population distribution (n° and%) according to the WAI - Work Ability Index dimensions score, Workers Hospital, São Paulo, 2008.

| Dimension                                                   | Points     |             |             |               |               |               |               |               |               |               |               | Total            |
|-------------------------------------------------------------|------------|-------------|-------------|---------------|---------------|---------------|---------------|---------------|---------------|---------------|---------------|------------------|
|                                                             | 0          | 1           | 2           | 3             | 4             | 5             | 6             | 7             | 8             | 9             | 10            |                  |
| Current work ability compared to the lifetime best          | --<br>(--) | 2<br>(0,2)  | 1<br>(0,1)  | 1<br>(0,1)    | --<br>(--)    | 21<br>(2,0)   | 16<br>(1,5)   | 84<br>(8,1)   | 295<br>(28,4) | 330<br>(31,8) | 287<br>(27,7) | 1.037<br>(100,0) |
| Work ability in relation to the job demand                  | --<br>(--) | --<br>(--)  | --<br>(--)  | --<br>(--)    | 3<br>(0,3)    | 4<br>(0,4)    | 49<br>(4,7)   | 110<br>(10,6) | 401<br>(38,7) | 226<br>(21,8) | 244<br>(23,5) | 1.037<br>(100,0) |
| Current diseases self-reported and diagnosed by a physician | *<br>(0,0) | 73<br>(7,0) | 51<br>(4,9) | 80<br>(7,7)   | 156<br>(15,0) | 257<br>(24,8) | *<br>(0,0)    | 420<br>(40,5) | *<br>(0,0)    | *<br>(0,0)    | *<br>(0,0)    | 1.037<br>(100,0) |
| Estimated work impairment due to diseases                   | *<br>(0,0) | 1<br>(0,1)  | 4<br>(0,4)  | 11<br>(1,1)   | 132<br>(12,7) | 197<br>(19,0) | 692<br>(66,7) | *<br>(0,0)    | *<br>(0,0)    | *<br>(0,0)    | *<br>(0,0)    | 1.037<br>(100,0) |
| Sick leave                                                  | *<br>(0,0) | 12<br>(1,2) | 21<br>(2,0) | 84<br>(8,1)   | 325<br>(31,3) | 595<br>(57,4) | *<br>(0,0)    | *<br>(0,0)    | *<br>(0,0)    | *<br>(0,0)    | *<br>(0,0)    | 1.037<br>(100,0) |
| Own prognosis of work ability                               | *<br>(0,0) | 40<br>(3,9) | *<br>(0,0)  | *<br>(0,0)    | 94<br>(9,1)   | *<br>(0,0)    | *<br>(0,0)    | 903<br>(87,1) | *<br>(0,0)    | *<br>(0,0)    | *<br>(0,0)    | 1.037<br>(100,0) |
| Mental resources                                            | *<br>(0,0) | 1<br>(0,1)  | 50<br>(4,8) | 295<br>(28,4) | 691<br>(66,6) | *<br>(0,0)    | *<br>(0,0)    | *<br>(0,0)    | *<br>(0,0)    | *<br>(0,0)    | *<br>(0,0)    | 1.037<br>(100,0) |

\* Nonexistent points at dimension score
